# Supplementary material for: Glycemic Control in Chinese Patients with Type 2 Diabetes Mellitus Receiving Oral Antihyperglycemic Medication-Only or Insulin-Only Treatment: A Cross-Sectional Survey
Source: Springer Nature journal article supplement (doi:10.1007/s13300-015-0114-2), 2015-06-01
Supplement: MOESM1 [file 9263336]

- This analysis explored whether glycemic control and the incidence of hypoglycemia are different between Chinese patients with Type 2 diabetes mellitus (T2DM) receiving oral antihyperglycemic medication (OAM)-only or insulin-only treatment regimens.
- As part of the Diabetes Disease Specific Programme, 200 physicians in 9 Chinese cities completed surveys about 1369 patients' demographic and clinical characteristics and clinical management details (OAM-only, N = 1077; insulin-only, N = 292).
- Insulin-only treatment was found to be associated with significantly better glycemic control than OAM-only treatment.
- Insulin-only treatment was found to be associated with significantly increased hypoglycemia compared with OAM-only treatment.
- These results provide important real-world information on glycemic control and hypoglycemia in Chinese patients with T2DM, which may be useful for guiding evidence-based management.

This summary slide represents the opinions of the authors. Sponsorship for this study was funded by Lilly Suzhou Pharmaceutical Company, Ltd . Medical writing assistance for this study was provided by Luke Carey and Tania Dickson (Envision Pharma Group). For a full list of acknowledgments and conflicts of interest for all authors of this article, please see the full text online. Copyright © The Authors 2015. Creative Commons Attribution Noncommercial License (CC BY-NC).
